# Supplementary material for: Comparative effectiveness of interventions for improving adherence to ocular hypotensive therapy in patients with glaucoma or ocular hypertension: protocol for network meta-analysis
Source: PubMed Central journal article supplement — BMJ Open. 2021 Aug 13;11(8):e054340. doi: 10.1136/bmjopen-2021-054340 (PMC8365822; doi:10.1136/bmjopen-2021-054340), 2021-08-13
Supplement: bmjopen-2021-054340supp001.pdf [file bmjopen-2021-054340supp001.pdf]

## Search Terms

### MEDLINE (Pubmed)

(Glaucoma[Mesh] OR Glaucoma[Tiab] OR “Ocular Hypertension”[Mesh] OR “Ocular Hypertension”[Tiab] OR “Intraocular Pressure”[Mesh] OR “Intraocular Pressure”[Tiab]) AND (Antiglaucoma\* OR Therap\* OR Drug\* OR Drop\* OR Treat\* OR Medicat\*) AND (“Medication Adherence”[Mesh] OR “Medication Adherence”[Tiab] OR “Patient Compliance”[Mesh] OR Adhere\* OR Non-adhere\* OR Nonadhere\* OR Complian\* OR Noncomplian\* OR Non-complian\*)

### Cochrane Central Register of Controlled Trials (CENTRAL) in The Cochrane Library (Wiley)

- #1 MeSH descriptor Glaucoma
- #2 MeSH descriptor Ocular Hypertension
- #3 MeSH descriptor Intraocular Pressure
- #4 Glaucoma\*
- #5 Ocular hypertensi\*
- #6 (#1 OR #2 OR #3 OR #4 OR #5)
- #7 Antiglaucoma\*
- #8 Therap\* OR Drug\* OR Drop\* OR Treat\* OR Medicat\*
- #9 (#7 OR #8)
- #10 MeSH descriptor Medication Adherence
- #11 MeSH descriptor Patient Compliance
- #12 Adhere\* OR Non-adhere\* OR Nonadhere\*
- #13 Complian\* OR Noncomplian\* OR Non-complian\*
- #14 (#10 OR #11 OR #12 OR #13)
- #15 (#6 AND #9 AND #14)

### EMBASE (Ovid)

(Glaucoma/exp OR Intraocular hypertension/exp OR Intraocular pressure/exp OR Glaucom\* OR Ocular hypertensi\*) AND (‘Antiglaucoma agent’/exp OR Antiglaucoma\* OR Therap\*)

OR Drug\* OR Drop\* OR Treat\* OR Medicat\*) AND ('Patient Compliance'/exp OR  
'Medication Compliance'/exp OR Adhere\* OR Non-adhere\* OR Nonadhere\* OR Compliant\*  
OR Noncompliant\* OR Non-compliant\*)

### Scopus

- #1. [All fields] glaucoma\* OR "Ocular hypertensi\*" OR "Intraocular Pressure"
- #2. [All fields] Antiglaucoma\* OR Therap\* OR Drug\* OR Drop\* OR Treat\* OR Medicat\*
- #3 [All fields] Adhere\* OR Non-adhere\* OR Nonadhere\* OR Compliant\* OR Noncompliant\*  
OR Non-compliant\*
- #4. (#1 AND #2 AND #3)
